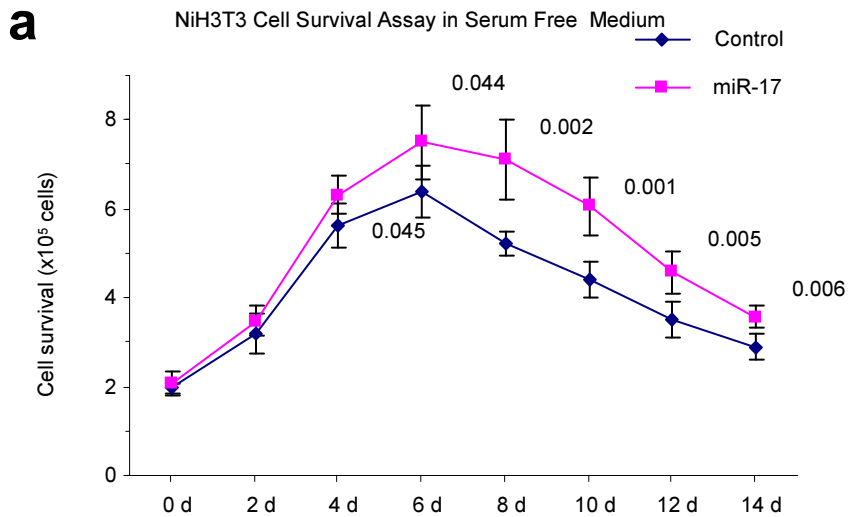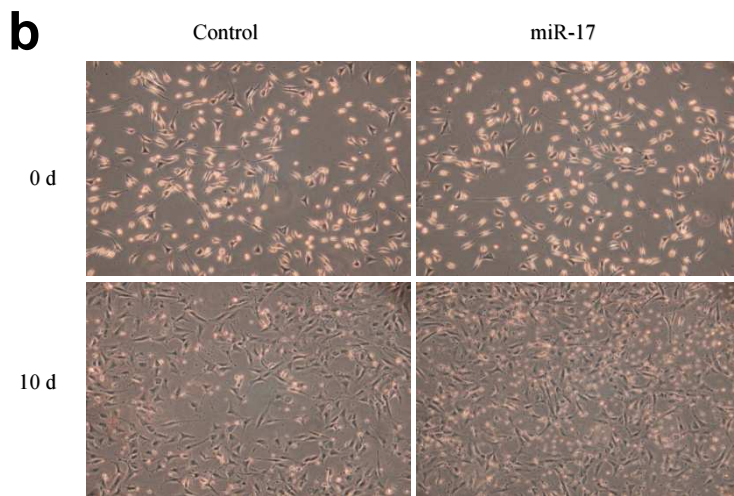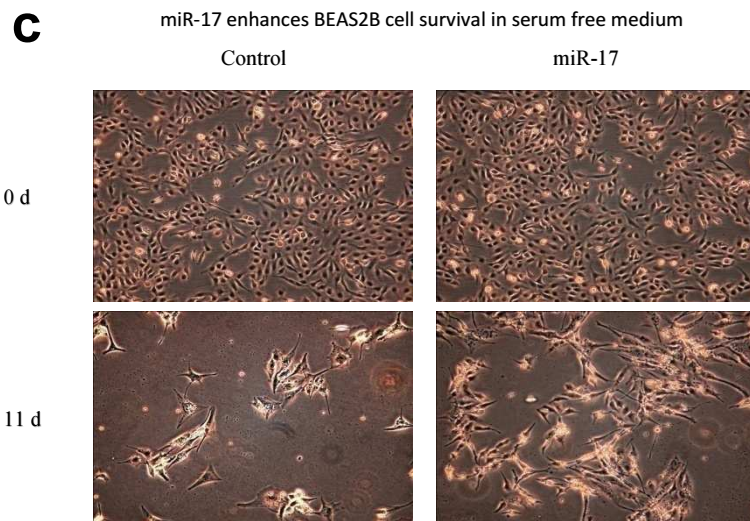

**Fig S1. Expression of miR-17 enhanced cell survival.** (a) Mock control and miR-17 transfected NiH3T3 cells were cultured in serum free medium for 10 days. Typical pictures showed that miR-17 transfected NiH3T3 Cells showed high viability compared with control cells. (b) miR-17 transfected NiH3T3 cells showed enhanced cell survival in cell survival assays. Asterisks indicate significant differences. \*,  $p < 0.05$ , \*\*,  $p < 0.01$ . Error bars, SD ( $n=6$ ). (c) Mock control and miR-17 transfected BEAS2B cells were cultured in serum free medium for 11 days. Typical pictures showed that miR-17 transfected EBAS2B Cells showed high viability compared with control cells.

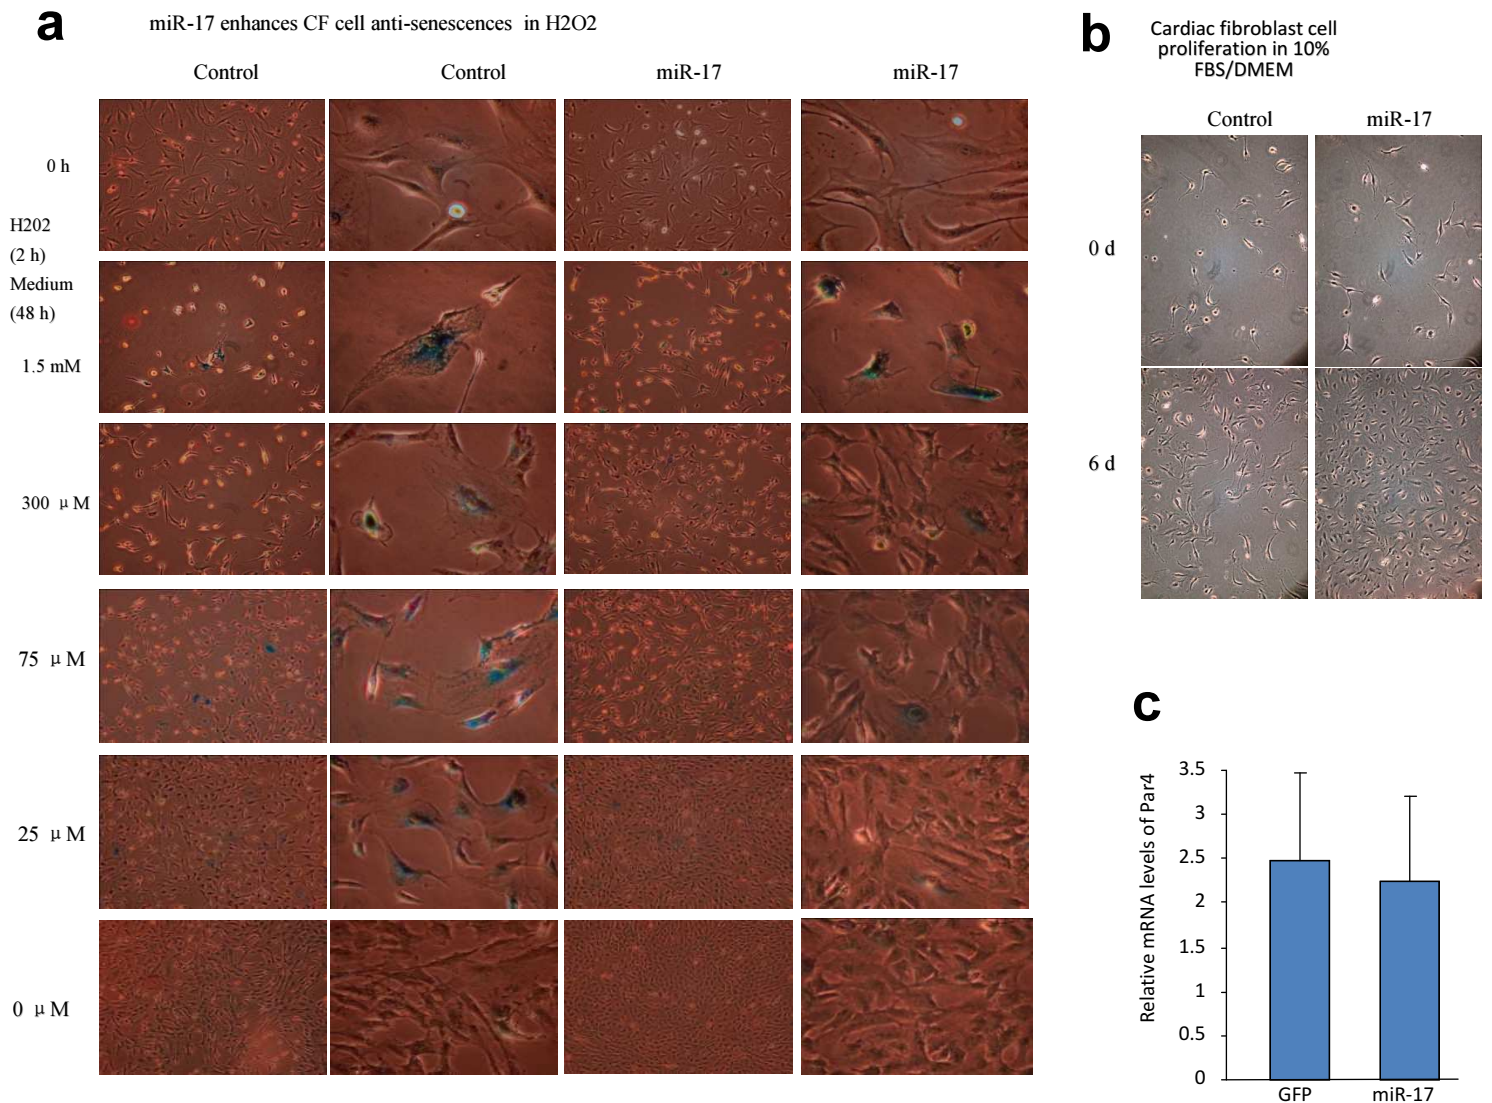

**Fig S2. Expression of miR-17 enhanced CF survival, and repressed senescence.**

(A) Mock control or miR-17 transfected CFs were treated with indicated concentration of H<sub>2</sub>O<sub>2</sub> for 2 hours, and then cultured in basal medium for 48 hours. Cell number were fixed and stained with β-gal. The typical images showed that miR-17 transfected MCFs showed enhanced cell survival and had less β-gal staining.

(B) Mock control or miR-17 transfected MCFs were culture in basal medium for 6 days. Typical images showed that miR-17 transfected CFs showed enhanced cell viability.

(C) Mock control or miR-17 transfected MCFs were subjected to RT-PCR to test the miRNA levels of Par4.



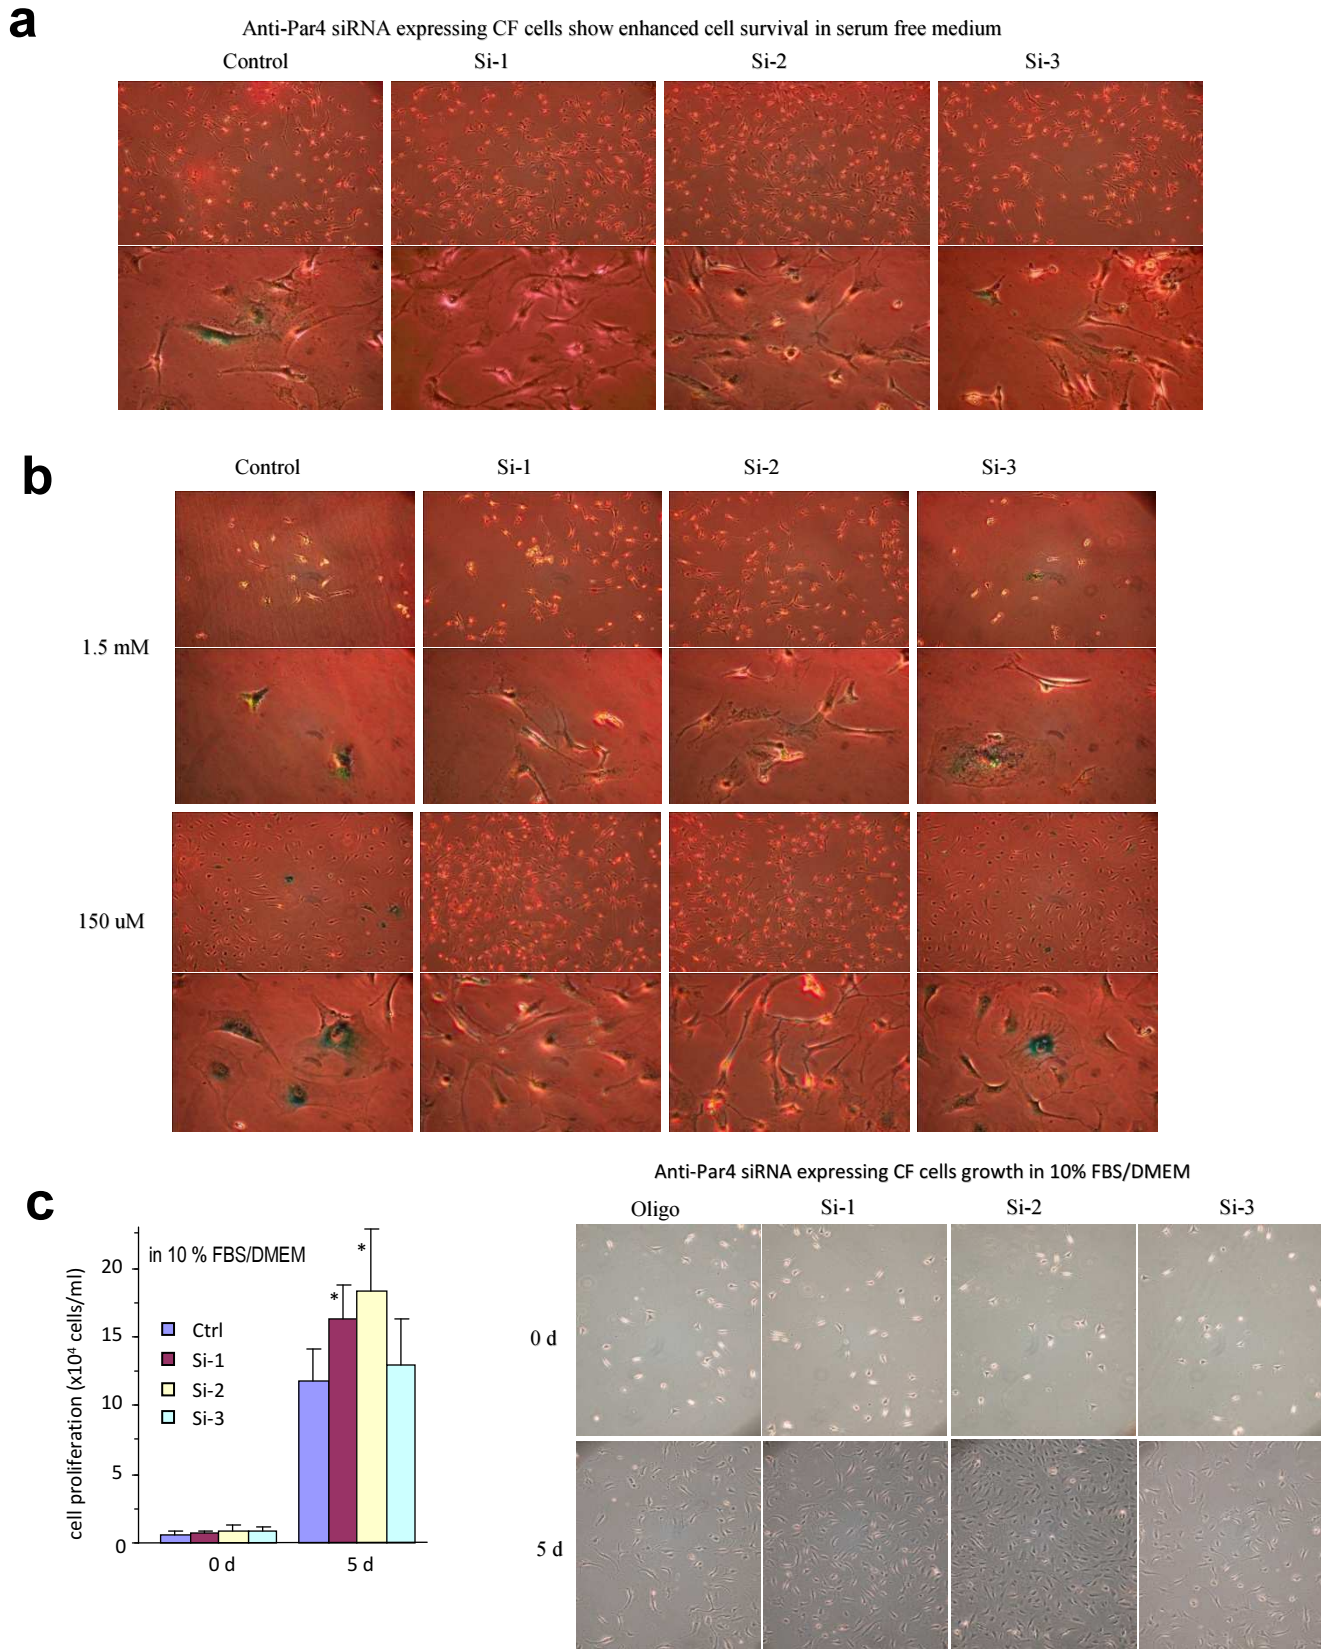

**Fig S3. Silencing Par4 enhanced CF survival and proliferation**

(A) Control oligos and anti-Par4 siRNA transiently transfected MCFs were cultured in serum free medium for 5 days, fixed and stained with  $\beta$ -gal. The typical images showed that miR-17 transfected CFs showed enhanced cell survival and had less  $\beta$ -gal staining.

(B) Control oligos and anti-Par4 siRNA transiently transfected MCFs were treated with indicated concentration of  $H_2O_2$  for 2 hours, and then cultured in basal medium for 48 hours. Cells were fixed and stained with  $\beta$ -gal. The typical images showed that miR-17 transfected CFs showed enhanced cell survival and had less  $\beta$ -gal staining.

(C) Left, Control oligos and anti-Par4 siRNA transiently transfected MCFs were cultured in indicated concentration of  $H_2O_2$  for 6 hours. Par siRNA transfected MCFs showed enhanced cell viability after treatment. Asterisks indicate significant differences. \*,  $p < 0.05$ , \*\*,  $p < 0.01$ . Error bars, SD ( $n=6$ ). Right, Typical photos are shown.

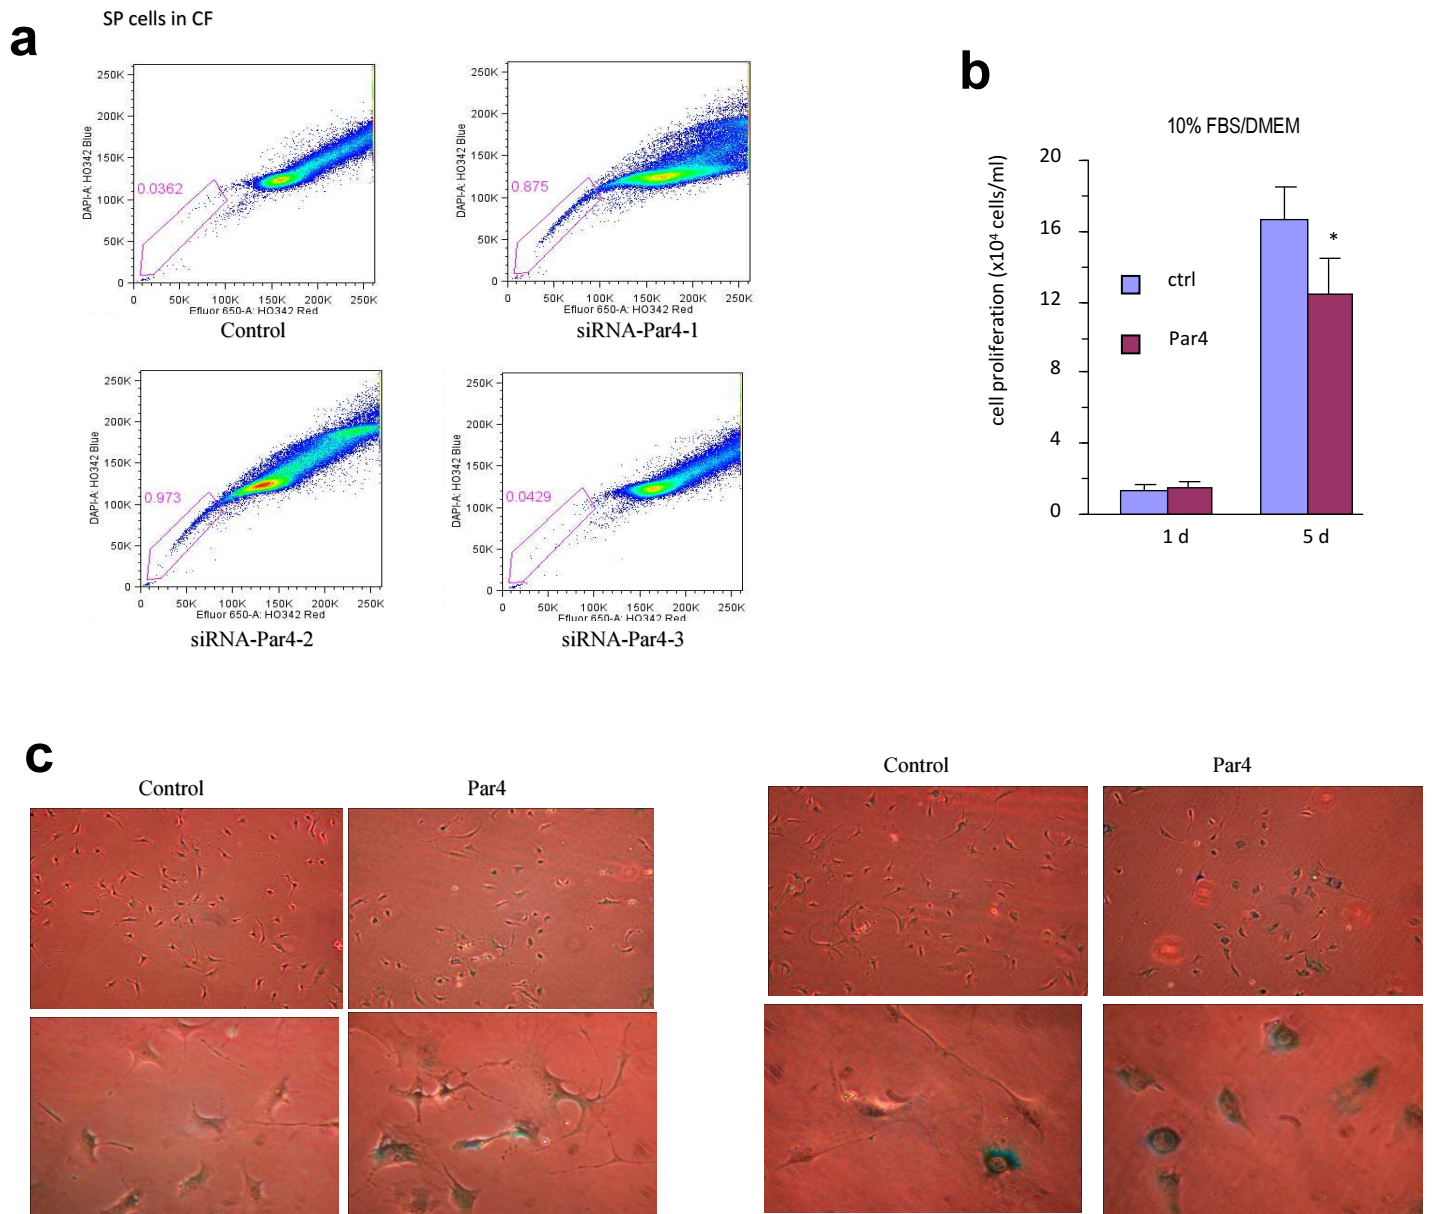

**Fig S4. Expression of Par4 repressed CF survival and self-renewal.**

(A) Control oligos and anti-Par4 siRNA transiently transfected MCFs were treated with 150  $\mu$ M H<sub>2</sub>O<sub>2</sub> for 2 hours, and then cultured in basal medium for 48 hours. The number of  $\beta$ -gal stained CFs were counted and quantified. Par4 siRNA transfected MCFs showed less  $\beta$ -gal staining. Asterisks indicate significant differences. \*\*,  $p < 0.01$ . Error bars, SD ( $n = 6$ ).

(B) The cells were culture in basal medium for 6 days. Par4 transfected miR-17 CFs showed repressed viability. \*,  $p < 0.05$ . Error bars, SD ( $n = 6$ ).

(C) Left, Control vector and Par4 transfected miR-17 MCFs were cultured in serum free medium for 5 days, fixed and stained with  $\beta$ -gal. The typical images showed that Par4 transfected miR-17 CFs showed decreased cell survival and had more  $\beta$ -gal staining. Right, Control vector and Par4 transfected miR-17 MCFs were cultured in 150  $\mu$ M H<sub>2</sub>O<sub>2</sub> for 2 hours, and cultured in basal medium for 48 hours. The typical images showed that Par4 transfected miR-17 CFs showed decreased cell survival and had more  $\beta$ -gal staining.
